# Supplementary material
Source: PubMed Central journal article supplement (PMC3664039)
Supplement: NIHMS409860-supplement-1.pdf [file NIHMS409860-supplement-1.pdf]

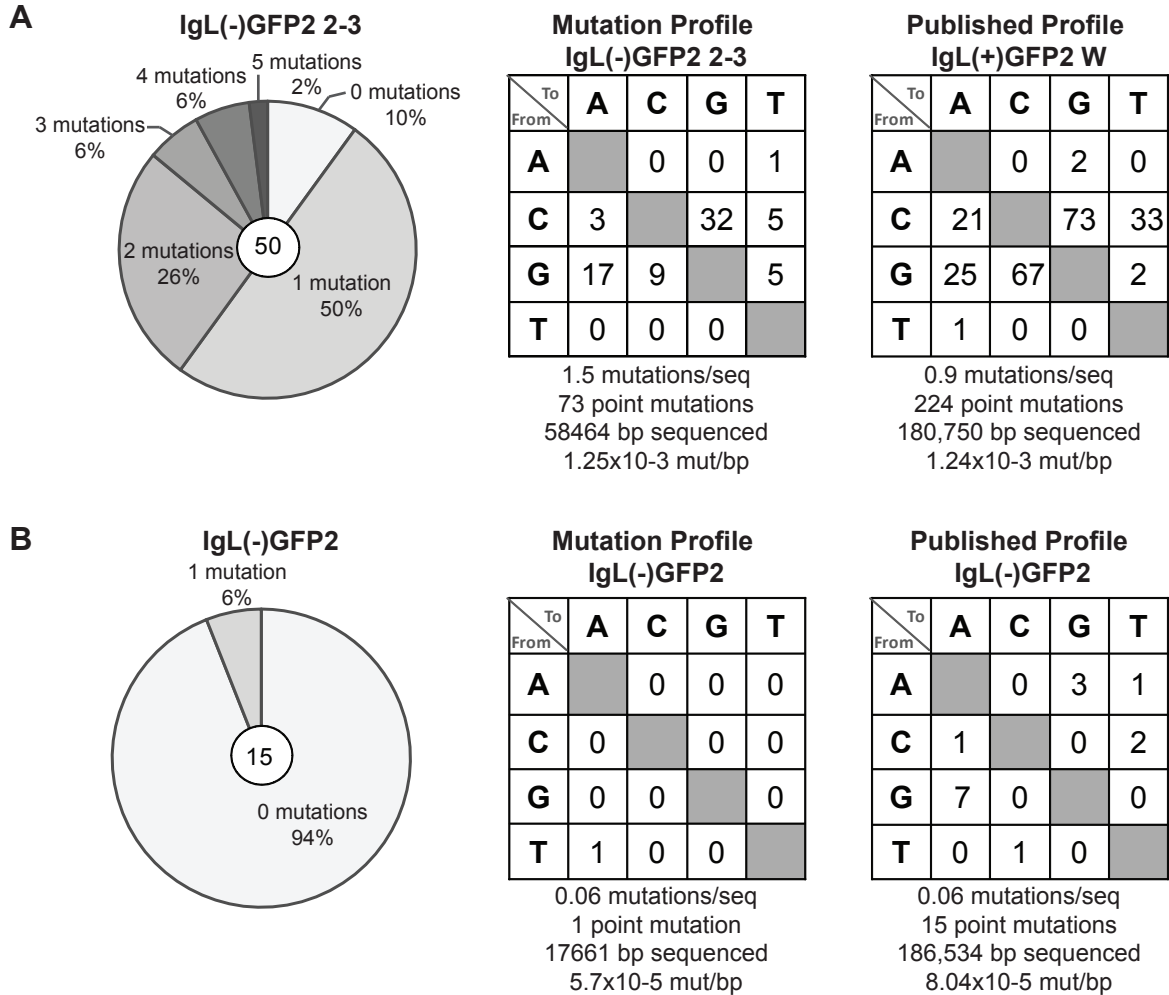

**Fig. S1. Sequence analysis of mutations supported by DIVAC 2-3.** Genomic DNA was isolated from (A) IgL(-)GFP2 2-3 and (B) IgL(-)GFP2 cell lines on day 21 post-subcloning. A 1217 bp region of the GFP2 expression cassette was PCR amplified, cloned, and sequenced. The pie chart shows the proportion of sequences containing the indicated number of mutations; the middle circle denotes the number of sequences analyzed. Mutation spectra are depicted in the box diagrams (left, sequences from this analysis; right, published data from (34)). Further information concerning the mutations and mutation frequencies are detailed below the mutation spectra.

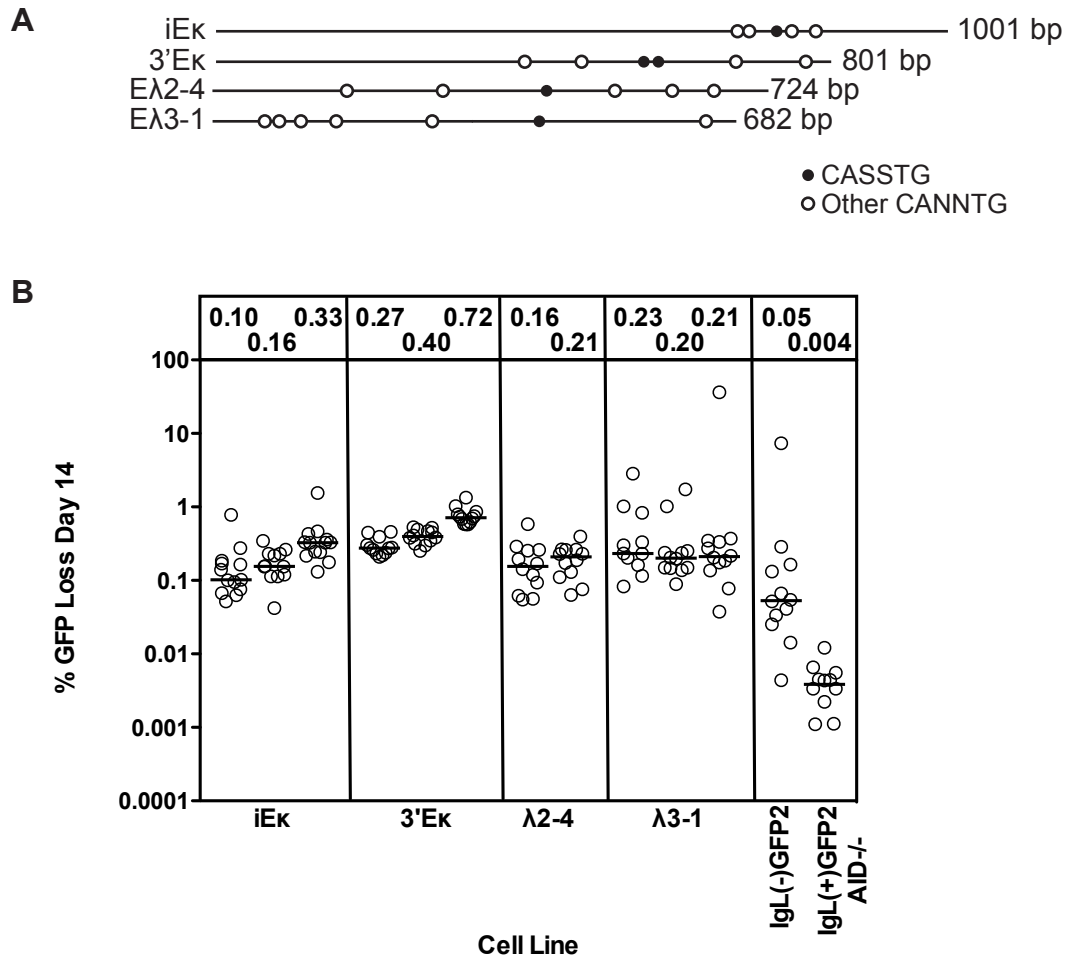

**Fig. S2. Analysis of DIVAC function associated with murine Ig light chain enhancers.** (A) Schematic diagram of the murine Ig light chain enhancers. The sizes of the fragments containing the intronic Igk enhancer (iEk), 3' Igk enhancer (3'Ek), Igλ 2-4 enhancer (Eλ2-4), and Igλ 3-1 enhancer (Eλ3-1), are indicated, as are the locations of E boxes conforming (closed symbols), or not conforming (open symbols) to the motif CASSTG. (B) Fluctuation analysis of GFP loss in subclones with data depicted as in Fig. 2D.

## Fig. S3

### A

AGCAGGCCGCATGGTACAGCTCCATCAGCACAGCTGGGGCCACACAAAGAGCTGGGTACTGTGGGCAGCAGGCT  
GAAACCCGAAAAACAAGAGCTGGGGGCTCAGAATAGCCCCGGGAGCAGGCAGGGCCTGGGGGAGAGGGCAAGCAC  
CAGGCCCAGGGCCACACAGCCCTTCCAGGAAGGCACAGCGCTGTGAGGGTGCAGCACGCTCAGCCCCACCATGCA  
GCTGTGCGGCCGGGGCATCCCCAAGCTAAATTTACTTCTCAGTCTCCAATCAGAACTGAAGCTGAGGGGCCACG  
CCGGCCAAAAAAGGAAACGAAACAGTCTCCAGAAAGCACTGACGTGTGAAGCAGAGCGAGCGCCCGCAAACCG  
GCCGCCATGTACACACCTCAGGTTGGGGCTTTGCCAGACTGAGCTTTGCTGCTGCTCGGGGTGGGTGCCACGGC  
CTGGGCACATGGGATGGGTACACACGTACACACACTTGACACCCACACCCCAACACTTCAGGTGATGCTGGTGC  
AGATGGGTGCCCCCAGGCTGACCCCGCTTGCAAAGAGGAGAGCATTTCATGGCTGTGGCAAAACAGCAACCGCC  
TGTTGTG**CAGCTG**GGATGGTGTATCTGGAAATGTACGCAGCCCAGGAGGGGTAACAGCTCCAACTGAGACCCT  
GAGCTTGTCCACAGTTGTAACAGGCTGACATAAACACCTTTGTCCGTGGAAAAATTTATCACCTCAAATATAG  
CAGGTTAATAAAATAAACTCCCAACGAGCTTACACCTGCTTTGGAAGGGAAGCAGAC**CACTTG**TTTTCTGCTTGT  
GTTGGCTGTAGGAAGCCATGTTTCCGATGCAGGAGGGCCACAAAGCACTGACAACACAATGTGAGCTGAGCTTCG  
CCCCTGTTAAGCCCCACCACAGGCTTGTGGCCCTAGAGCAGACAGGGCGCAGGGGTGGCACCAGGGCTGGGTG  
ACATGGGCTGGTCTGGGGTGTCTCACTGAGCTCTTTGGGAGGGGTTGGAGCCCTGGGGCAATCACAGCACACAC  
AGGAGGTGGGGGGATGCAGCCAG**CAGCTG**CCCTGCACTAAGAAAACCCCATCCGTGGCTTT**CAGATG**GCCTTCC  
CATCTCTGCGACCTCTGCATGGGCTGAGCACAAGGTTAAAGTGTCTGCCATGTTTTGGGCATGTTTGGAGGG  
GCAGCGTGGGCCCGGGCATAACGGTACCGC**CACGTG**CTGCCAGCCCC**CAGCTG**AGCCTGCACTCTCC**CAGATG**  
GCTGACCGCAGCCACGGGGCAACAGTTTCTTTGCTAAAAATTGTAGCCGGGAAGAAAA**CACGTG**GCAACTTCGG  
CCAAACAG**CAGCTG**GAGGACAGGAATAGCCGTGGCCACGGCACGCTCTGCTTCTCGGCACAAACATTCCAGTACG  
TGGCACCACGAGCGCCGCTGCCCGGCACAGCAGCAAGCAGAGCCAGGAGCAGGAAATGCTGATTTGGGCCCAT  
TTGGCCATGGCTGAGAGAAGAGGCTTCCAGGGAGCTGGTCACTTGGTCCCCAAGCTGTGGCTTGGGAAATGATG  
GGGAGGGGATTGCCACTGCCACCCTGCAGAGCAGGCTCTGGTCCCATCTCACTGCAGGGCACCAGGGCGTTTGC  
ACTGCAGCAATTACAGAAACATTGAAATGGCTCCT

### B

AACATCCCACCAGCACACGGGGCTCAGCACGCTGGCGACGTGGCATCAGCAGAGCAGGCCGCATGGTACAGCTC  
CATCAGCAC**AGCTG**GGGGCCACACAAAGAGCTGGGTACTGTGGGCAGCAGGCTGAAACCCGAAAAACAAGAGCTGG  
GGGCTCAGAATAGCCCCGGGAGCAGGCAGGGCCTGGGGGAGAGGGCAAGCACCAGGCCCAGGGCCACACAGCCC  
TTCCAGGAAGGCACAGCGCTGTGAGGGTGCAGCACGCTCAGCCCCACCATG**CAGCTG**TGCGGCCGGGGCATCCCC  
AAGCTAAATTTACTTCTCAGTCTCCAATCAGAACTGAAGCTGAGGGGCCACGCCGGCCAAAAAAGGAAACGAAA  
CAGTCTCCAGAAAGCACTGACGTGTGAAGCAGAGCGAGCGCCGCGCAAACCGCCGCCATGTACACACCTCAGGT  
TGGGGCTTTGCCAGACTGAGCTTTGCTGCTGCTCGGGGTGGGTGCCACGGCCTGGGCACATGGGATGGGGTACA  
CACGTACACAC**CACTTG**CACACCCACACCCCAACACTTCAGGTGATGCTGGTGCAGATGGGTGCCCCACAGGCTGAC  
CCCCCACGCATGGCCTGGCCACACTGCTCCATCCGTGTCTGACTAGCGGCGGAGCCCC**AGCTG**TAGGAA  
GCTCAGAGCCATCACACAGCAATTAAGAGGAATTAATTAATAATAAATGTTTTAGGCGGGCT**CAGCTG**CCAGCA  
**CCACTG**ACC GAAACAGCCCGCTTGCAAAGAGGAGAGCATTTCATGGCTGTGGCAAAACAGCAACCGCCTGTTGT  
**GCAGCTG**GGATGGTGTATCTGGAAATGTACGCAGCCCAGGAGGGGTAACAGCTCCAACTGAGACCCTGAGCTT  
GTCCACAGGTTGTAACAGGCTGACATAAACACCTTTGTGCCGTGGAAAAATTTATCACCTCAAATATAGCAGGTT  
AATAAAATAAACTCCCAACGAGCTT**CACACTG**CTTTGGAAGGGAAGCAGAC**CACTTG**TTTTCTGCTTGTGTTGGC  
TGTAGGAAGCCATGTTTCCGATGCAGGAGGGCCACAAAGCACTGACAACACAATGTGAGCTGAGCTTCGCCCTG  
TTAAGCCCCACCACAGGGCTTGTGGCCCTAGAGCAGACAGGGCGCAGGGGTGGCACCAGGGCTGGGTGACATGG  
GCTGGTCTGGGGTGTCTCACTGAGCTCTTTGGGAGGGGTTGGAGCCCTGGGGCAATCACAGCACACAGAGG  
AGGTGGGGGGATGCAGCCAG**CAGCTG**CCCTGCACTAAGAAAACCCCATCCGTGGCTTT**CAGATG**GCCTTCCCATC  
TCTCTGCGACCTCTGCATGGGCTGAGCACAAGGTTAAAGTGTCTGCCATGTTTTGGGCATGTTTGGAGGGGAG  
CGTGGGCCCGGGCATAACGGTACCGC**CACGTG**CTGCCAGCCCC**CAGCTG**AGCCTGCACTCTCC**CAGATG**TGCTG  
ACCGCAGCCACGGGGCAACAGTTTCTTTGCTAAAAATTGTAGCCGGGAAGAAAA**CACGTG**GCAACTTCGGCCAA  
ACAG**CAGCTG**GAGGACAGGAATAGCCGTGGCCACGGCACGCTCTGCTTCTCGGCACAAACATTCCAGTACGTGGC  
ACCACGAGCGCCGCTGCCCGGCACAGCAGCAAGCAGAGCCAGGAGCAGGAAATGCTGATTTGGGCCCATTTTGG  
CCATGGCTGAGAGAAGAGGCTTCCAGGGAGCTGGTCACTTGGTCCCCAAGCTGTGGCTTGGGAAATGATGGGG  
AGGGGATTGCCACTGCCACCCTGCAGAGCAGGCTCTGGTCCCATCTCACTGCAGGGCACCAGGGCGTTTGCATG  
CAGCAATTACAGAAACATTGAAATGGCTCCT

**Fig. S3. Sequences of key DIVAC fragments.** (A) DIVAC 1703. (B) DIVAC 1928. In both, the F2 core is the 5' underlined section and the F3 core is 3' underlined section. E boxes are indicated in bold.

**Table S1****A**

| <b>Construct Name</b>    | <b>Primer Sequence</b>                                                                                 | <b>Template DNA</b> | <b>Product Size (bp)</b> |
|--------------------------|--------------------------------------------------------------------------------------------------------|---------------------|--------------------------|
| <b>1</b>                 | F: cccgctagcctgggaacagggggagtctg<br>R: ccactagtcctgtggtcccgtgagt                                       | DT40 Genomic        | 1493                     |
| <b>2</b>                 | F: cccgctagctgaggagcatgtgctgaatta<br>R: ccactagtgggctgttcggtcaggt                                      | DT40 Genomic        | 1476                     |
| <b>3</b>                 | F: cccgctagcggcggagccccagctgtagg<br>R: ccactagtgcggtgctccccaggatacca                                   | DT40 Genomic        | 1633                     |
| <b>2a</b>                | F: 2 F<br>R: ccactagctctgctgatgccacgtc                                                                 | 2                   | 590                      |
| <b>2b</b>                | F: cccgctagcaacatcccaccagcacacg<br>R: ccactagtcagagacacggatggagcagt                                    | 2                   | 650                      |
| <b>2c</b>                | F: cccgctagccccccaggctgacccc<br>R: 2 R                                                                 | 2                   | 350                      |
| <b>2b-1</b>              | F: 2b F<br>R: ccactagtgaagggctgtgtggcctgggcc                                                           | 2                   | 227                      |
| <b>2b-2</b>              | F: cccgctagcagccccgggagcaggcagggcct<br>R: ccactagtcaaagctcagtctggcaaagccc                              | 2                   | 316                      |
| <b>2b-3</b>              | F: cccgctagcagagcgagcgccgcgcaaaccggc<br>R: 2b R                                                        | 2                   | 244                      |
| <b>1-3</b>               | F: 1 F<br>R: 3 R                                                                                       | DT40 Genomic        | 4384                     |
| <b>2-3</b>               | F: 2 F<br>R: 3 R                                                                                       | DT40 Genomic        | 2989                     |
| <b>2-3Δ2a</b>            | F: 2b F<br>R: 3 R                                                                                      | 2-3                 | 2452                     |
| <b>2-3Δ2c</b>            | F: 2 F<br>R: 2b R                                                                                      | 2-3<br>(added to 3) | 2640                     |
| <b>2-3Δ2a/2c</b>         | Digested 2b vector and inserted into 3                                                                 | --                  | 2103                     |
| <b>2-3ΔN</b>             | F: 2 F<br>R: ccactagtacaagctcggggctcagttg                                                              | 2-3                 | 1610                     |
| <b>2-3Δ3'N</b>           | F: 2 F<br>R: ccactagtaacatggcagaaacacttaaac                                                            | 2-3                 | 2118                     |
| <b>2-3Δ5'N</b>           | F1: 2 F<br>R1: tccaaacatgccc aaagggctgtttcgggtca<br>F2: tgaccgaaacagcccttgggcatgtttgga<br>R2: 3 R      | 2-3                 | 2347                     |
| <b>2-3ΔCR1</b>           | F: 2 F<br>R: ccactagtaggagccatttcaatgtttctgtga                                                         | 2-3                 | 2626                     |
| <b>2b-2<br/>Δ1-50</b>    | F: cccgctagcagccccgggagcaggcag<br>R: 2b-2 R                                                            | 2b-2                | 265                      |
| <b>2b-2<br/>Δ51-100</b>  | F1: 2b-2 F<br>R1: ctgcatggtggggctgactgggctgtgtcctgcc<br>F2: tcagcccaccatgcagc<br>R2: 2b-2 R            | 2b-2                | 266                      |
| <b>2b-2<br/>Δ101-150</b> | F1: 2b-2 F<br>R1: ctgattggagactgagaaggcgtgctgcaccctgac<br>F2: cccgctagccttctcagctccaatca<br>R2: 2b-2 R | 2b-2                | 266                      |
| <b>2b-2</b>              | F1: 2b-2 F                                                                                             | 2b-2                | 265                      |

|                                    |                                                                                                                             |            |      |
|------------------------------------|-----------------------------------------------------------------------------------------------------------------------------|------------|------|
| <b>Δ151-201</b>                    | R1: actgtttcgtttccttttaaatagcttggggat<br>F2: cccgctagcaaaaggaaacgaaacagt<br>R2: 2b-2 R                                      |            |      |
| <b>2b-2<br/>Δ202-254</b>           | F1: 2b-2 F<br>R1: gcggccggtttgcgcggttggccggcggtgggccc<br>F2: cccgctagcgccgcgcaaacggcgccg<br>R2: 2b-2 R                      | 2b-2       | 263  |
| <b>2b-2<br/>Δ255-316</b>           | F: 2b-2 F<br>R: ccactagtgtcgtctgtcttcacac                                                                                   | 2b-2       | 253  |
| <b>2b-2 154</b>                    | F1: cccgctagctcagcccaccatgcagc<br>R1: ccactagtgtcgtctgtcttcacac                                                             | 2b-2       | 154  |
| <b>3a</b>                          | F: 3 F<br>R: ccactagtgtcagtgtttgtggcctc                                                                                     | 3          | 456  |
| <b>3b</b>                          | F: cccgctagcccattgttcccagtgagg<br>R: ccactagtggaaaactgttccccggtg                                                            | 3          | 471  |
| <b>3c</b>                          | F: cccgctagcccacagctgagcctgcactc<br>R: ccactagtgtgaacaaggcaggagccat                                                         | 3          | 455  |
| <b>3Δa</b>                         | F: cccgctagcccattgttcccagtgagg<br>R: 3 R                                                                                    | 3          | 888  |
| <b>3Δb</b>                         | F1: 3 F<br>R1: gctcagctgtggtgtcagtgtttg<br>F2: caaagcactgacaccacagctgagc<br>R2: 3 R                                         | 3          | 1262 |
| <b>3a+b</b>                        | F: 3 F<br>R: 3b R                                                                                                           | 3          | 1216 |
| <b>3c3</b>                         | F: 3c F<br>R: 3 R                                                                                                           | 3          | 807  |
| <b>PG</b>                          | F1: cccgctagctcagcccaccatgcagc<br>R1: ccactagtgttcagatggaacttctatgttc                                                       | W          | 700  |
| <b>DIVAC<br/>1703</b>              | F1: cccgctagcagcaggccgcatggtac<br>R1: ctctctttgcaagcgggtcagcctgggggg<br>F2: ccccccaggctgaccccgttgcaagaggag<br>R2: 2-3ΔCR1 R | DIVAC 2-3  | 1703 |
| <b>DIVAC<br/>1703<br/>Δ1-200</b>   | F: cccgctagccagcacgctcagccc<br>R: 2-3ΔCR1 R                                                                                 | DIVAC 1703 | 1503 |
| <b>DIVAC<br/>1703<br/>Δ201-400</b> | F1: DIVAC 1703 F1<br>R1: tctggcaaagccccaccctgacagcgctg<br>F2: cagcgtgtcagggtggggccttgccagac<br>R2: 2-3ΔCR1 R                | DIVAC 1703 | 1503 |
| <b>DIVAC<br/>1703<br/>Δ401-600</b> | F1: DIVAC 1703 F1<br>R1: cagctgcacaacaggcaacctgaggtgtgtgacatg<br>F2: cacacacctcaggttgctgtgtgcagct<br>R2: 2-3ΔCR1 R          | DIVAC 1703 | 1503 |
| <b>DIVAC<br/>1703<br/>Δ601-800</b> | F1: DIVAC 1703 F1<br>R1: ctgcttccctccaaggtgtgtttgcc<br>F2: ggcaaaacagcaacctggaagggaagcag<br>R2: 2-3ΔCR1 R                   | DIVAC 1703 | 1503 |
| <b>DIVAC</b>                       | F1: DIVAC 1703 F1                                                                                                           | DIVAC 1703 | 1503 |

|                                           |                                                                                                                    |            |      |
|-------------------------------------------|--------------------------------------------------------------------------------------------------------------------|------------|------|
| <b>1703<br/>Δ801-1000</b>                 | R1: cagtgagacaccccaagcaggtgtgtagctc<br>F2: gagctacacacctgctggggtgtctcactg<br>R2: 2-3ΔCR1 R                         |            |      |
| <b>DIVAC<br/>1703<br/>Δ1001-<br/>1200</b> | F1: DIVAC 1703 F1<br>R1: gccctccaaacatgctggaccagcccatgctc<br>F2: gacatgggctggctccgcatgtttggaggggc<br>R2: 2-3ΔCR1 R | DIVAC 1703 | 1503 |
| <b>DIVAC<br/>1703<br/>Δ1201-<br/>1400</b> | F1: DIVAC 1703 F1<br>R1: agcagagcgtgccgtgccaaaaacatggcag<br>F2: ctgccatgttttggcacggcacgctctgct<br>R2: 2-3ΔCR1 R    | DIVAC 1703 | 1503 |
| <b>DIVAC<br/>1703<br/>Δ1401-<br/>1703</b> | F: DIVAC 1703 F1<br>R: cccactagtgccacggctattct                                                                     | DIVAC 1703 | 1400 |
| <b>DIVAC<br/>1928</b>                     | F: 2b F<br>R: 2-3ΔCR1 R                                                                                            | 2-3Δ2a/2c  | 1928 |
| <b>DIVAC<br/>1928<br/>Δ1</b>              | F1: 2b F<br>R1: ccttttttggccggcaccctgacagcgtgtg<br>F2: agcgtgtcagggctccggccaaaaaaaggaaac<br>R2: 2-3ΔCR1 R          | DIVAC 1928 | 1878 |
| <b>DIVAC<br/>1928<br/>Δ2</b>              | F1: 2b F<br>R1: ccttttttggccgggcttgggatgccccggc<br>F2: ggggcatccccaaagcccggccaaaaaaaggaaac<br>R2: 2-3ΔCR1 R        | DIVAC 1928 | 1878 |
| <b>DIVAC<br/>1928<br/>Δ3</b>              | F1: 2b F<br>R1: ggcgctcgtctgctcgtgggccccctcagcttc<br>F2: gctgagggggcccacgagcagagcagcggcgcg<br>R2: 2-3ΔCR1 R        | DIVAC 1928 | 1878 |
| <b>DIVAC<br/>1928<br/>Δ4</b>              | F1: 2b F<br>R1: gtctggcaaagcccctcacacgtcagtgcttc<br>F2: agcactgacgtgtgaggggctttgccagactga<br>R2: 2-3ΔCR1 R         | DIVAC 1928 | 1878 |
| <b>DIVAC<br/>1928<br/>Δ5</b>              | F1: 2b F<br>R1: cctgtgtgtgctgtgggaccagcccatgtcac<br>F2: acatgggctgtcccacagcacacagggagg<br>R2: 2-3ΔCR1 R            | DIVAC 1928 | 1878 |
| <b>DIVAC<br/>1928<br/>Δ6</b>              | F1: 2b F<br>R1: ggatggggtttctattgccccagggtcca<br>F2: agccctggggcaataagaaaaccccatccgtg<br>R2: 2-3ΔCR1 R             | DIVAC 1928 | 1878 |
| <b>DIVAC<br/>1928<br/>Δ7</b>              | F1: 2b F<br>R1: ctcagcccatgcagaggagtcagggcagctgctg<br>F2: cagctgccctgcactcctctgcatgggctgagcac<br>R2: 2-3ΔCR1 R     | DIVAC 1928 | 1878 |
| <b>DIVAC<br/>1928<br/>Δ8</b>              | F1: 2b F<br>R1: cccctccaaacatgcctgcagagagatgggaag<br>F2: cccatctctctgcaggcatgtttggaggggag<br>R2: 2-3ΔCR1 R         | DIVAC 1928 | 1878 |
| <b>DIVAC<br/>1928<br/>Δ9</b>              | F1: 2b F<br>R1: tggggctggcggccaaaaacatggcagaaa<br>F2: ctgccatgttttggccggcagccccacag<br>R2: 2-3ΔCR1 R               | DIVAC 1928 | 1878 |
| <b>DIVAC<br/>1928</b>                     | F1: 2b F<br>R1: ctgttgccccctggcagcgtggcggtagccgta                                                                  | DIVAC 1928 | 1878 |

|                        |                                                                                                              |                       |      |
|------------------------|--------------------------------------------------------------------------------------------------------------|-----------------------|------|
| <b>Δ10</b>             | F2: gggtagccgcccacgtgccacgggggcaacagtttc<br>R2: 2-3ΔCR1 R                                                    |                       |      |
| <b>DIVAC 1928 Δ11</b>  | F1: 2b F<br>R1: tggccgaagttgccacgtctgcggtcagcacatctg<br>F2: atgtgctgaccgagacgtggcaactcggcca<br>R2: 2-3ΔCR1 R | DIVAC 1928            | 1878 |
| <b>DIVAC 1928 Δ12</b>  | F1: 2b F<br>R1: gaagcagagcgtgccgtggtttctcccggctac<br>F2: gccgggaagaaaaccacggcagctctgcttc<br>R2: 2-3ΔCR1 R    | DIVAC 1928            | 1878 |
| <b>DIVAC 1928 Δ13</b>  | F1: 2b F<br>R1: ccgggcagcggcgctgccacggctattcctgtc<br>F2: aggaatagccgtggcagcggcctgcccggcac<br>R2: 2-3ΔCR1 R   | DIVAC 1928            | 1878 |
| <b>DIVAC 1928 Δ14</b>  | F1: 2b F<br>R1: aaatggggcccaaatacctggtgccaatactgg<br>F2: gtatgtggcaccacggattgggccccatttgg<br>R2: 2-3ΔCR1 R   | DIVAC 1928            | 1878 |
| <b>DIVAC 1928 Δ15</b>  | F1: 2b F<br>R1: tggggaccaagctgaccaagcatttctgctcctgg<br>F2: gagcaggaaatgctgtgacagcttggtcccca<br>R2: 2-3ΔCR1 R | DIVAC 1928            | 1878 |
| <b>DIVAC 1928 Δ16</b>  | F1: 2b F<br>R1: gtgggcagtggaagctccctggaagcctcttc<br>F2: aggttccaggagcttgccactgccaccctg<br>R2: 2-3ΔCR1 R      | DIVAC 1928            | 1878 |
| <b>DIVAC 1928 Δ17</b>  | F1: 2b F<br>R1: caaacgccctggtgctcccctccccatcatttc<br>F2: tgatggggaggggagcaccagggcgtttgac<br>R2: 2-3ΔCR1 R    | DIVAC 1928            | 1878 |
| <b>DIVAC 1928 Δ18</b>  | F: 2b F<br>R: cccactagtctgcagtgagatgggac                                                                     | DIVAC 1928            | 1878 |
| <b>1-3 ΔF2 core</b>    | F1: 1 F<br>R1: tctggcaaagccccaccctgacagcgctg<br>F2: cagcgctgtcaggggtggggctttgccagac<br>R2: 3 R               | DIVAC 1-3             | 4184 |
| <b>1-3 ΔF3 core</b>    | F1: 1 F<br>F2: cgggtaccgcccacgtgttgccactgccaccctgcag<br>R1: ggtgggcagtggaacacgtggcggtagccgat<br>R2: 3 R      | DIVAC 1-3             | 4034 |
| <b>1-3 ΔF2/F3 core</b> | F1: 1 F<br>R1: tctggcaaagccccaccctgacagcgctg<br>F2: cagcgctgtcaggggtggggctttgccagac<br>R2: 3 R               | DIVAC 1-3<br>ΔF3 core | 3834 |
| <b>2-3 ΔF2 core</b>    | F1: 2 F<br>R1: tctggcaaagccccaccctgacagcgctg<br>F2: cagcgctgtcaggggtggggctttgccagac<br>R2: 3 R               | DIVAC 2-3             | 2789 |
| <b>2-3 ΔF3 core</b>    | F1: 2 F<br>F2: cgggtaccgcccacgtgttgccactgccaccctgcag<br>R1: ggtgggcagtggaacacgtggcggtagccgat<br>R2: 3 R      | DIVAC 2-3             | 2639 |
| <b>2-3 ΔF2/F3</b>      | F1: 2 F<br>R1: tctggcaaagccccaccctgacagcgctg                                                                 | DIVAC 2-3<br>ΔF2      | 2439 |



|                                  |                                                                                                                                               |                        |      |
|----------------------------------|-----------------------------------------------------------------------------------------------------------------------------------------------|------------------------|------|
| <b>core</b>                      | F2: cagcgctgtcaggggtgggggctttgccagac<br>R2: 3 R                                                                                               |                        |      |
| <b>DIVAC 1928<br/>ΔF2 core</b>   | F1: 2b F<br>R1: tctggcaaagccccaccctgacagcgctg<br>F2: cagcgctgtcaggggtgggggctttgccagac<br>R2: 2-3ΔCR1 R                                        | DIVAC 1928             | 1728 |
| <b>DIVAC 1928<br/>Δ1201-1400</b> | F1: 2b F<br>R1: agcagagcggtgccgtgcaaaaaacatggcag<br>F2: ctgccatgttttggcacggcacgctctgct<br>R2: 2-3ΔCR1 R                                       | DIVAC 1928             | 1728 |
| <b>DIVAC 751</b>                 | F1: cccgctagccagcagctcagccc<br>R1: gccctccaaacatgctcagcctggggggcacc<br>F2: ggtgccccccaggtgacgcatgttggaggggc<br>R2: cccactagttcccctcccacatcttc | DIVAC 1928             | 751  |
| <b>Murine iEk</b>                | F: cccgctagccaaggaaaggggtgacttatt<br>R: cccactagtacacaagcacataaggaaga                                                                         | C57BL/6<br>Genomic DNA | 1001 |
| <b>Murine 3'Ek</b>               | F: cccgctagcagctcaaaccagcttaggctac<br>R: cccactagttgtctgggccccatgaaacatc                                                                      | C57BL/6<br>Genomic DNA | 801  |
| <b>Murine EA2-4</b>              | F: cccgctagctggggataactcagtaatcttc<br>R: cccactagttgctctaccaagttgct                                                                           | C57BL/6<br>Genomic DNA | 724  |
| <b>Murine EA3-1</b>              | F: cccgctagctctagttccactatcatctc<br>R: cccactagtcttactcctttgtgctct                                                                            | C57BL/6<br>Genomic DNA | 682  |

## B

| Gene                                           | PCR Fragment | Primer                                                                                  | Ta | Product Size (bp) |
|------------------------------------------------|--------------|-----------------------------------------------------------------------------------------|----|-------------------|
| <b>γ-actin</b>                                 | --           | F: acagcattcgggtggagt<br>R: ttgagcatcctccttcacac<br>Probe: cctcagccctcacctgcacg         | 60 | 127               |
| <b>RSV Promoter (in IgLGFP2)</b>               | a            | F: ttcttcatgcaattgtcggg<br>R: ctgctccctgctgtgtg<br>Probe: tgctcgcgcactactcagcg          | 60 | 95                |
| <b>GFP2 (in IgLGFP2)</b>                       | b            | F: tgaccctgaagttcatctgc<br>R: gaagtcgtgctgcttcatgt<br>Probe: cccaccctcgtgaccaccct       | 60 | 125               |
| <b>IRES (in IgLGFP2)</b>                       | c            | F: ccttaggaatgctcgtcaag<br>R: cctaacgttactggccgaag<br>Probe: ttccgggcccctcacattgc       | 60 | 139               |
| <b>BSR (in IgLGFP2)</b>                        | d            | F: aatggcttctgcacaaacag<br>R: gcgacagagaagattacaatgc<br>Probe: cgaattgccgtcccacatg      | 60 | 141               |
| <b>2b</b>                                      | e            | F: tccaatcagaaactgaagctg<br>R: cgctctgcttcacacgtc<br>Probe: aggaaacgaaacagtctccagaaagca | 60 | 80                |
| <b>3</b>                                       | f            | F: agctggaggacaggaatagc<br>R: ctctgctgctgctgtgc<br>Probe: cgctctgcttctcggcaca           | 60 | 109               |
| <b>W fragment, upstream of cores (DIVAC 1)</b> | g            | F: gatctgctacagccactcca<br>R: gctggatggagacataggg<br>Probe: cagcacctccagccatcca         | 60 | 113               |

|                                                     |          |                                                                                                           |    |     |
|-----------------------------------------------------|----------|-----------------------------------------------------------------------------------------------------------|----|-----|
| <b>W fragment,<br/>between cores<br/>(Δ601-800)</b> | <b>h</b> | <b>F:</b> aaacagctccaaactgagacc<br><b>R:</b> cacggcacaaggtgttat<br><b>Probe:</b> ccgagctgtccacaggtgtaaaca | 60 | 74  |
| <b>18S</b>                                          | --       | <b>F:</b> taaaggaattgacggaaggg<br><b>R:</b> tgtcaatcctgtccgtgc<br><b>Probe:</b> cgcaggctccactcctggtg      | 60 | 102 |

**Table S1. Primer and probe sequences for experiments.** (A) Primers for the creation of all tested DIVAC fragments. (B) qPCR primer pairs and probes for gene expression and ChIP. All sequences are written 5' to 3'.
